# Supplementary material for: Integrating Single-Cell RNA-Seq and Bulk RNA-Seq Data to Explore the Key Role of Fatty Acid Metabolism in Breast Cancer
Source: MDPI journal article supplement (doi:10.3390/ijms241713209), 2023-08-25
Supplement: s1 [file s1]

**Table S1. Oligonucleotides used in research**

| <b>Oligonucleotides</b> | <b>Nucleotide sequence (5'-3')</b>                            |
|-------------------------|---------------------------------------------------------------|
| <b>siRNA</b>            |                                                               |
| SiRNA-NC                | UUCUCCGAACGUGUCACGUTT                                         |
| Si-NDUFAB1              | GACCUGGGCUUAGACAGUUTT                                         |
| <b>Primer</b>           |                                                               |
| $\beta$ -actin          | CCTGGCACCCAGCACAAT (forward)<br>GGGCCGGACTCGTCATACT (reverse) |
| NDUFAB1                 | ATGGCGTCTCGTGTCTTTC(forward)<br>AACCTGCGCGAGCACTAAG (reverse) |

---
